# Supplementary figures and images for: Dopamine dysregulation syndrome in Parkinson's disease: from clinical and neuropsychological characterisation to management and long-term outcome
Source: HighWire-hosted journal article supplement (doi:10.1136/jnnp-2012-303988), 2013-04-16

**Online Figure:** Flow chart of the study design

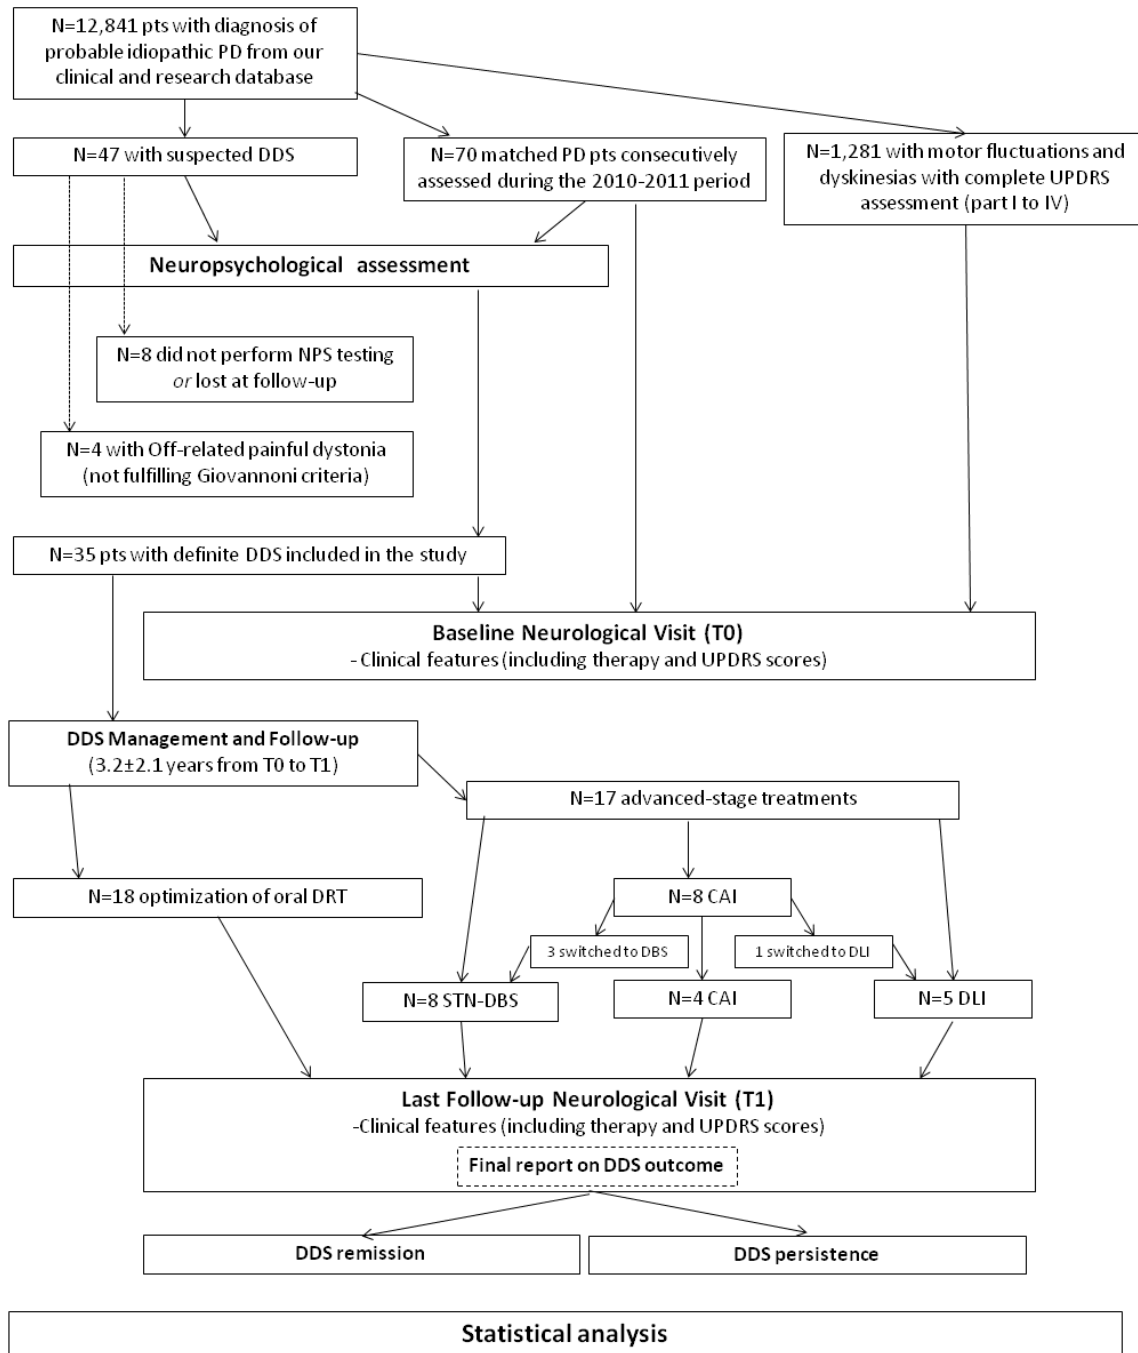

Supplement: jnnp-2012-303988supp_figure.pdf [file jnnp-2012-303988supp_figure.pdf]
